# Supplementary material
Source: PubMed Central journal article supplement (PMC3257521)
Supplement: NIHMS345917-supplement-1_si_001.pdf [file NIHMS345917-supplement-1_si_001.pdf]

# Structural and Kinetic Isotope Effect Studies of Nicotinamidase (Pnc1) from *S. cerevisiae*

Brian C. Smith, Mark A. Anderson, Kelly A. Hoadley, James L. Keck, W. Wallace Cleland, and John M.

Denu

## SUPPORTING INFORMATION

### Contents:

- **Supporting Discussion.** Derivation explaining observed kinetic isotope effects for Pnc1 D51N.
- **Table S1.** Primers used in Pnc1 mutagenesis.
- **Figure S1.** Double-reciprocal inhibition plots.
- **Figure S2.** Multiple-sequence alignment of nicotinamidases.

## Supporting Discussion

*Derivation explaining observed kinetic isotope effects for Pnc1 D51N.* For Pnc1 D51N, both the  $^{15}\text{N}$  and  $^{13}\text{C}$  KIE are  $\sim 0.5\%$  compared to  $\sim 1.25\%$  for those of Pnc1 WT (Table 3). We believe this is due to an increase in one of the back reaction off rates. A truncated derivation demonstrating how this is possible is shown below. The entire reaction is described by equation S1.

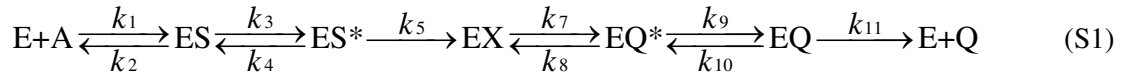

The KIE are on  $V/K$  which includes all steps up through and including the first irreversible step where  $k_1$  is substrate binding,  $k_2$  is substrate dissociation,  $k_3$  is the formation of the tetrahedral intermediate,  $k_4$  is the breakdown of the tetrahedral intermediate to reform nicotinamide, and  $k_5$  is the isotope sensitive irreversible step (C–N bond cleavage and the loss of  $\text{NH}_3$ ).  $V/K$  is expressed by:

$$\frac{V}{KE_t} = \frac{\frac{k_1 k_3 k_5}{k_2 k_4}}{1 + \frac{k_5}{k_4} + \frac{k_5 k_3}{k_4 k_2}} \quad (\text{S2})$$

However when the kinetic data are examined we see the  $k_{\text{cat}}$  and  $k_{\text{cat}}/K_m$  values have decreased compared to the wild-type enzyme. This is due to a decrease in binding of nicotinamide in the D51N mutant which leads to an increase in  $k_2$  and a decrease in  $k_3$ . As such  $k_3/k_2$  would tend to be very small and can be ignored. Then using the  $^{15}\text{N}$  KIE notation the equation becomes:

$$^{15}\left(\frac{V}{K}\right) = \frac{^{15}k_5 + \frac{k_5}{k_4}}{1 + \frac{k_5}{k_4}} \quad (\text{S3})$$

where  $^{15}\left(\frac{V}{K}\right)$  is the measured KIE and  $^{15}k_5$  is the intrinsic KIE.  $^{15}\left(\frac{V}{K}\right)$  is defined as

$$\frac{^{15}k_5 + C_f + ^{15}K_{\text{eq}}}{1 + C_f + C_r} \text{ where } C_f \text{ and } C_r \text{ are forward and reverse commitments to catalysis and } ^{15}K_{\text{eq}} \text{ is the } ^{15}\text{N}$$

equilibrium isotope effect. In this reaction there is no reverse commitment since the C-N bond cleavage is irreversible and thus  $C_r$  and  $^{15}K_{eq}$  can be disregarded and:

$$^{15}\left(\frac{V}{K}\right) = \frac{^{15}k_5 + C_f}{1 + C_f} \quad (S4)$$

For this example, an intrinsic isotope effect of 3% will be assumed and then for wild type and D51N we have:

$$1.0122 \pm 0.0002 = \left(\frac{1.0300 + C_{fwt}}{1 + C_{fwt}}\right), \text{ and } C_{fwt} = 1.50 \pm 0.04 \quad (S5)$$

$$1.0045 \pm 0.0006 = \left(\frac{1.0300 + C_{fd51N}}{1 + C_{fd51N}}\right), \text{ and } C_{fd51N} = 5.50 \pm 0.82 \quad (S6)$$

Equation 12 shows that  $C_f = \frac{k_5}{k_4}$  and so the  $C_f$  values are  $\left(\frac{k_5}{k_4}\right)_{WT} \sim 1.5$  and  $\left(\frac{k_5}{k_4}\right)_{Mut} \sim 5.5$

These values show that the reaction partitions forward faster in the D51N mutant, resulting in a smaller KIE. The mechanism of this partitioning is unknown but indicates that  $k_5$  (loss of  $NH_3$ ) has increased or that breakdown of the tetrahedral intermediate ( $k_4$ ) has decreased.

**Table S1.** Primers used in Pnc1 mutagenesis.

| <b>Pnc1 mutant</b> | <b>Primers</b>                                                                                                           |
|--------------------|--------------------------------------------------------------------------------------------------------------------------|
| D8A                | 5' -CGAGATGAAGACTTTAATTGTTGTTGCTATGCAAAATGATTTTATTTACC-3'<br>5' -GGTGAAATAAAAATCATTTTGCATAGCAACAACAATTAAAGTCTTCATCTCG-3' |
| D8N                | 5' -CGAGATGAAGACTTTAATTGTTGTTAATATGCAAAATGATTTTATTTACC-3'<br>5' -GGTGAAATAAAAATCATTTTGCATATTAACAACAATTAAAGTCTTCATCTCG-3' |
| D8E                | 5' -CGAGATGAAGACTTTAATTGTTGTTGAGATGCAAAATGATTTTATTTACC-3'<br>5' -GGTGAAATAAAAATCATTTTGCATCTCAACAACAATTAAAGTCTTCATCTCG-3' |
| D51A               | 5' -GTGGTCACCAGAGCTTGGCACCCTTCC-3'<br>5' -GGAAGGGTGCCAAGCTCTGGTGACCAC-3'                                                 |
| D51N               | 5' -GTGGTCACCAGAAATTGGCACCCTTCC-3'<br>5' -GGAAGGGTGCCAATTTCTGGTGACCAC-3'                                                 |
| H53A               | 5' -GGTCACCAGAGATTGGGCCCCTTCCAGAC-3'<br>5' -GTCTGGAAGGGGGCCAATCTCTGGTGACC-3'                                             |
| H94A               | 5' -TGTGGCCCGTAGCCTGTGTGAAAAACACC-3'<br>5' -GGTGTTTTTTACACAGGCTACGGGCCACA-3'                                             |
| K122A              | 5' -GATTGTCGACGCGGGTTTCTTGACTGACC-3'<br>5' -GGTCAGTCAAGAAACCCGCGTCGACAATC-3'                                             |
| K122R              | 5' -GATTGTCGACAGGGTTTCTTGACTGACC-3'<br>5' -GGTCAGTCAAGAAACCCCTGTCGACAATC-3'                                              |
| C167A              | 5' -AGCTTTGGAGTATGCTGTCAAAGCCACCG-3'<br>5' -CGGTGGCTTTGACAGCATACTCCAAAGCT-3'                                             |

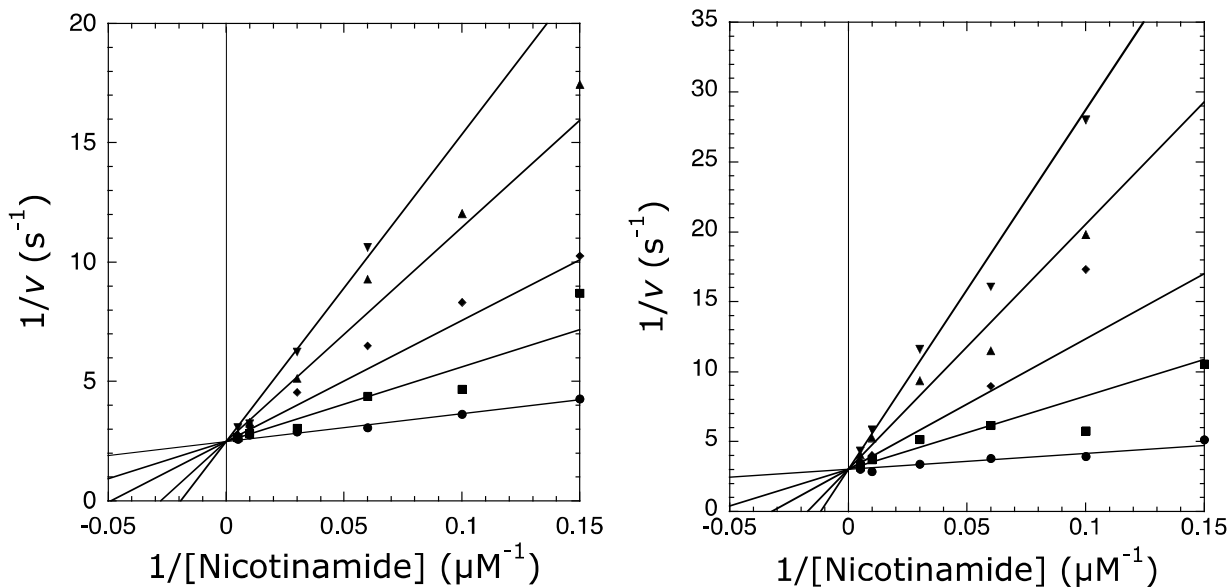

**Figure S1.** Double-reciprocal inhibition plots. Initial rates were determined as described under Experimental Procedures. (left) Nicotinic acid exhibits competitive inhibition toward nicotinamide during the Pnc1-catalyzed reaction. The following nicotinic acid concentrations were used: 0 (●), 200 (■), 400 (◆), 800 (♦), and 1200  $\mu\text{M}$  (◆). (right) Nicotinaldehyde exhibits competitive inhibition toward nicotinamide during the Pnc1-catalyzed reaction. The following nicotinaldehyde concentrations were used: 0 (●), 1 (■), 2 (◆), 4 (♦), and 6  $\mu\text{M}$  (◆). Data were fit to competitive inhibition models using KinetAsyst as described in Experimental Procedures. All reactions were performed at pH 7.5.
